# Supplementary material
Source: PubMed Central journal article supplement (PMC4342546)

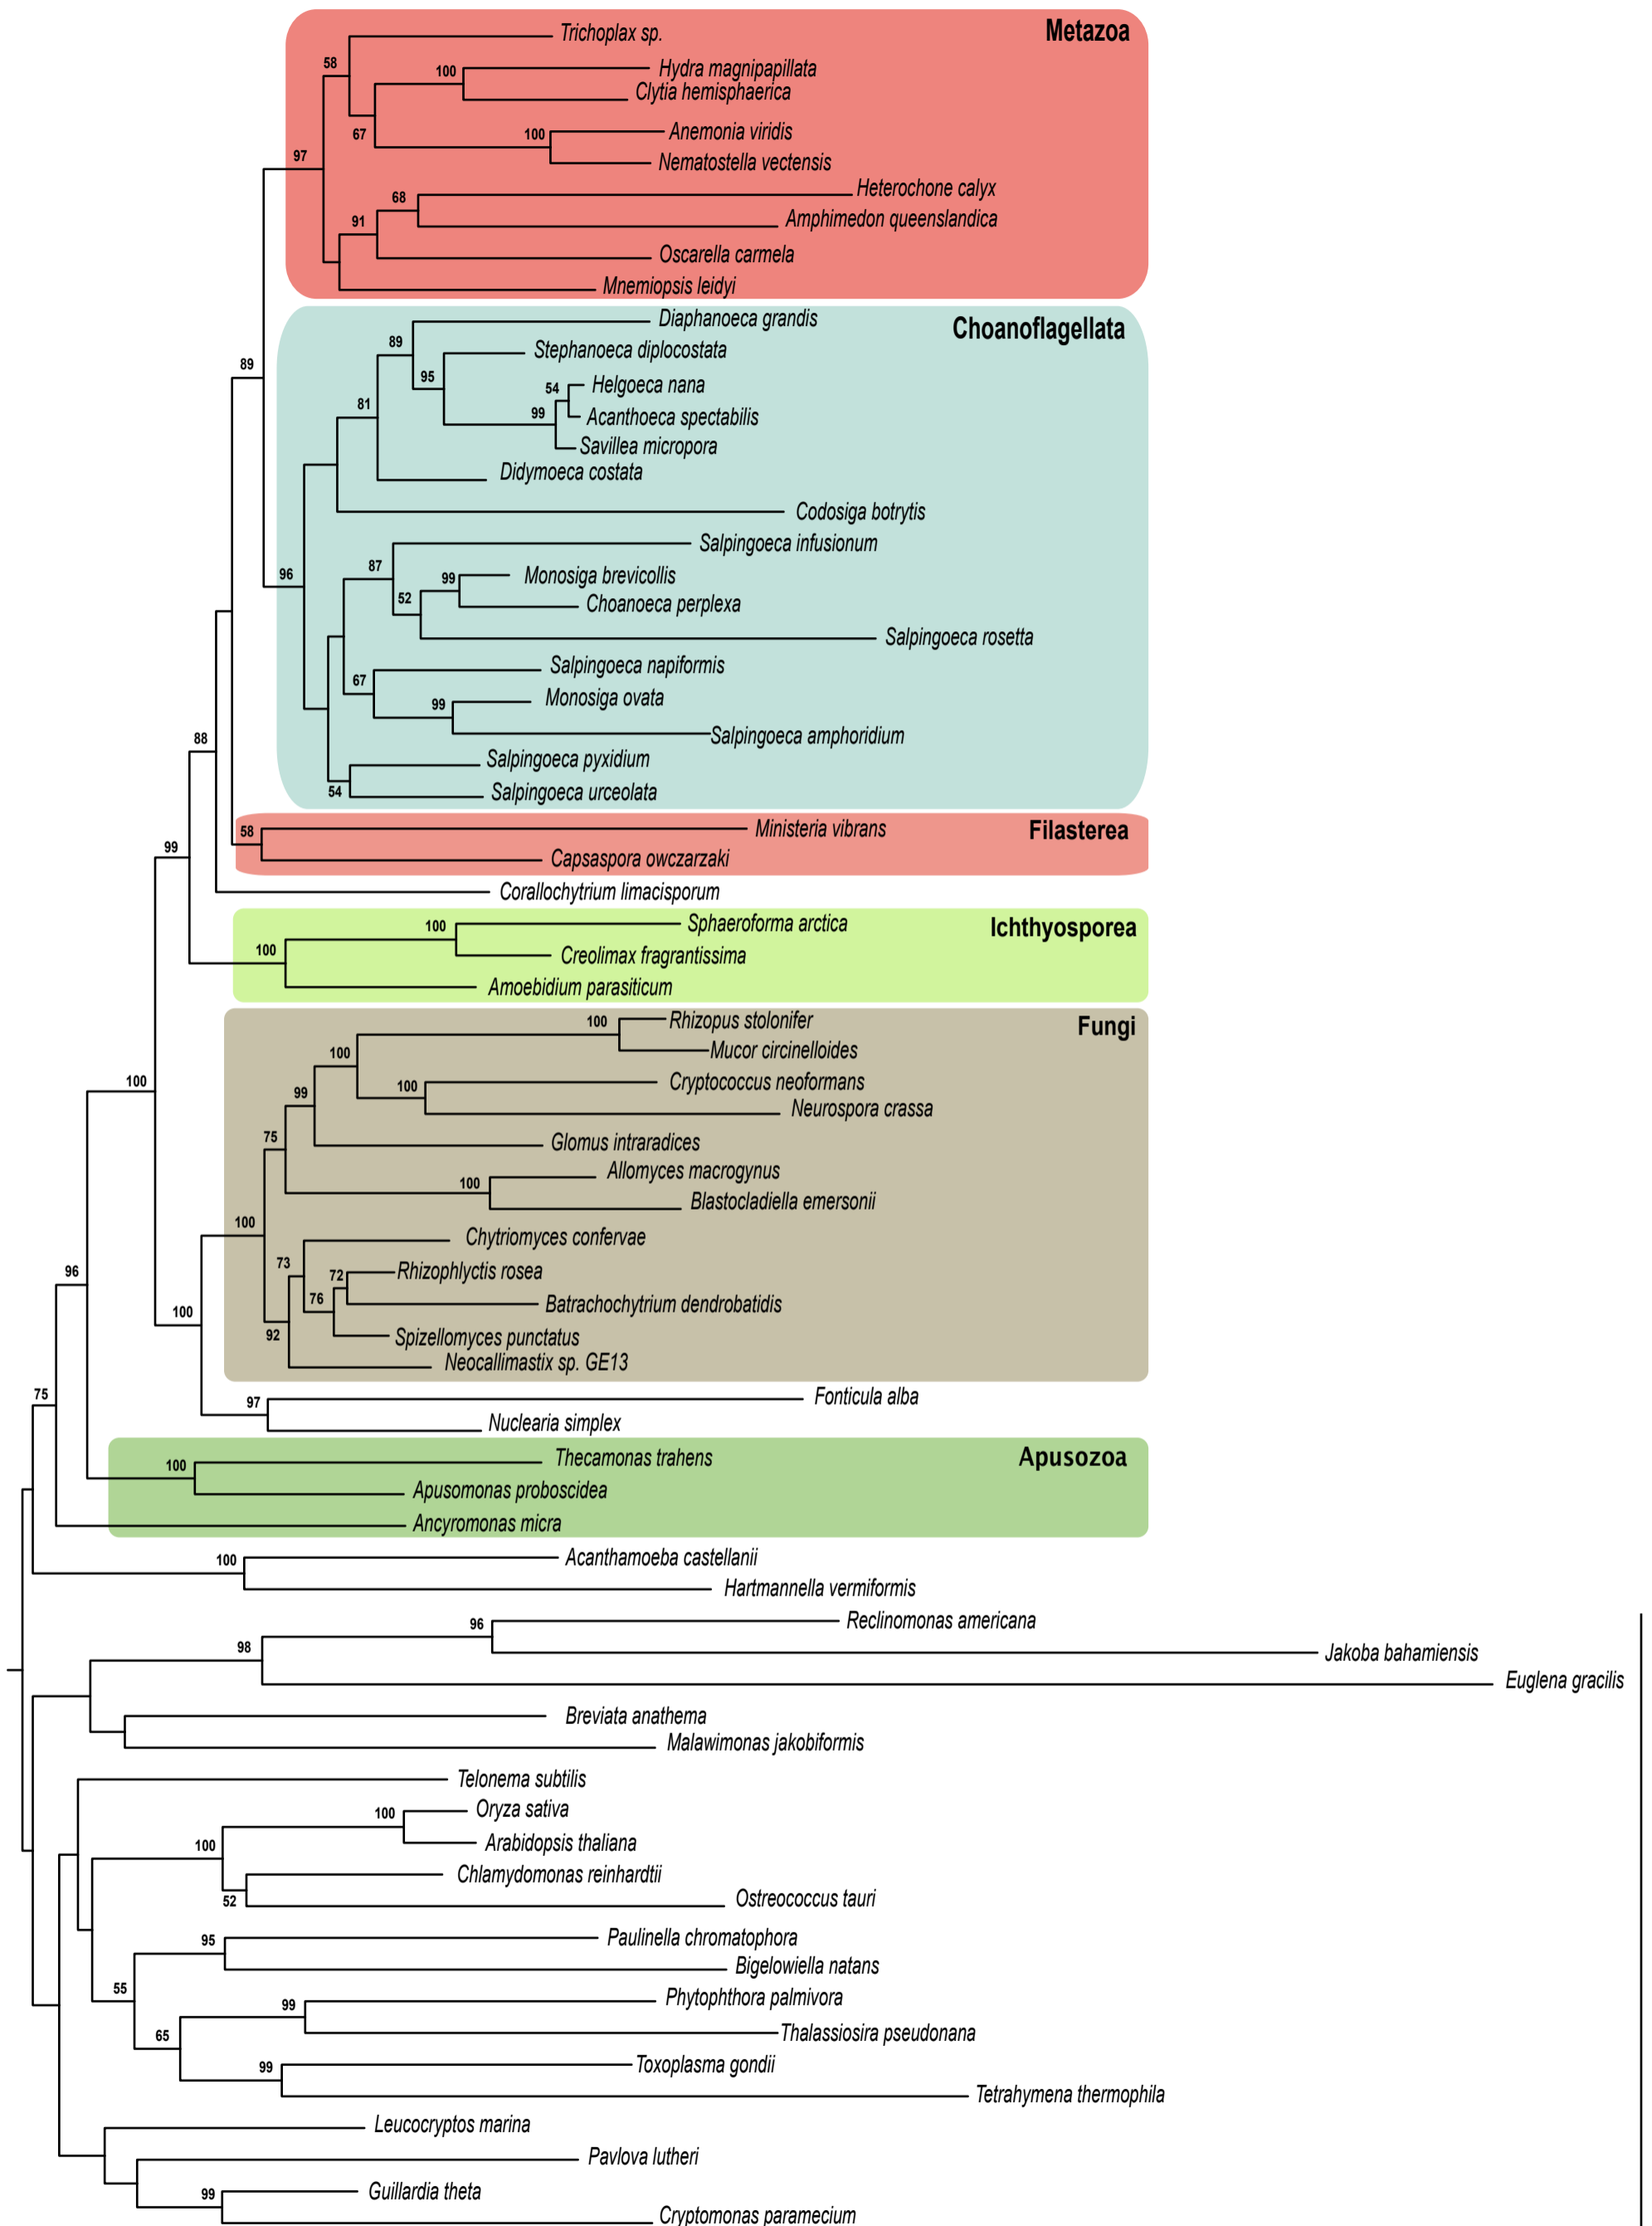

Bikonta

Supplement: NIHMS62057-supplement-Supplementary_Material_2.pdf [file NIHMS62057-supplement-Supplementary_Material_2.pdf]

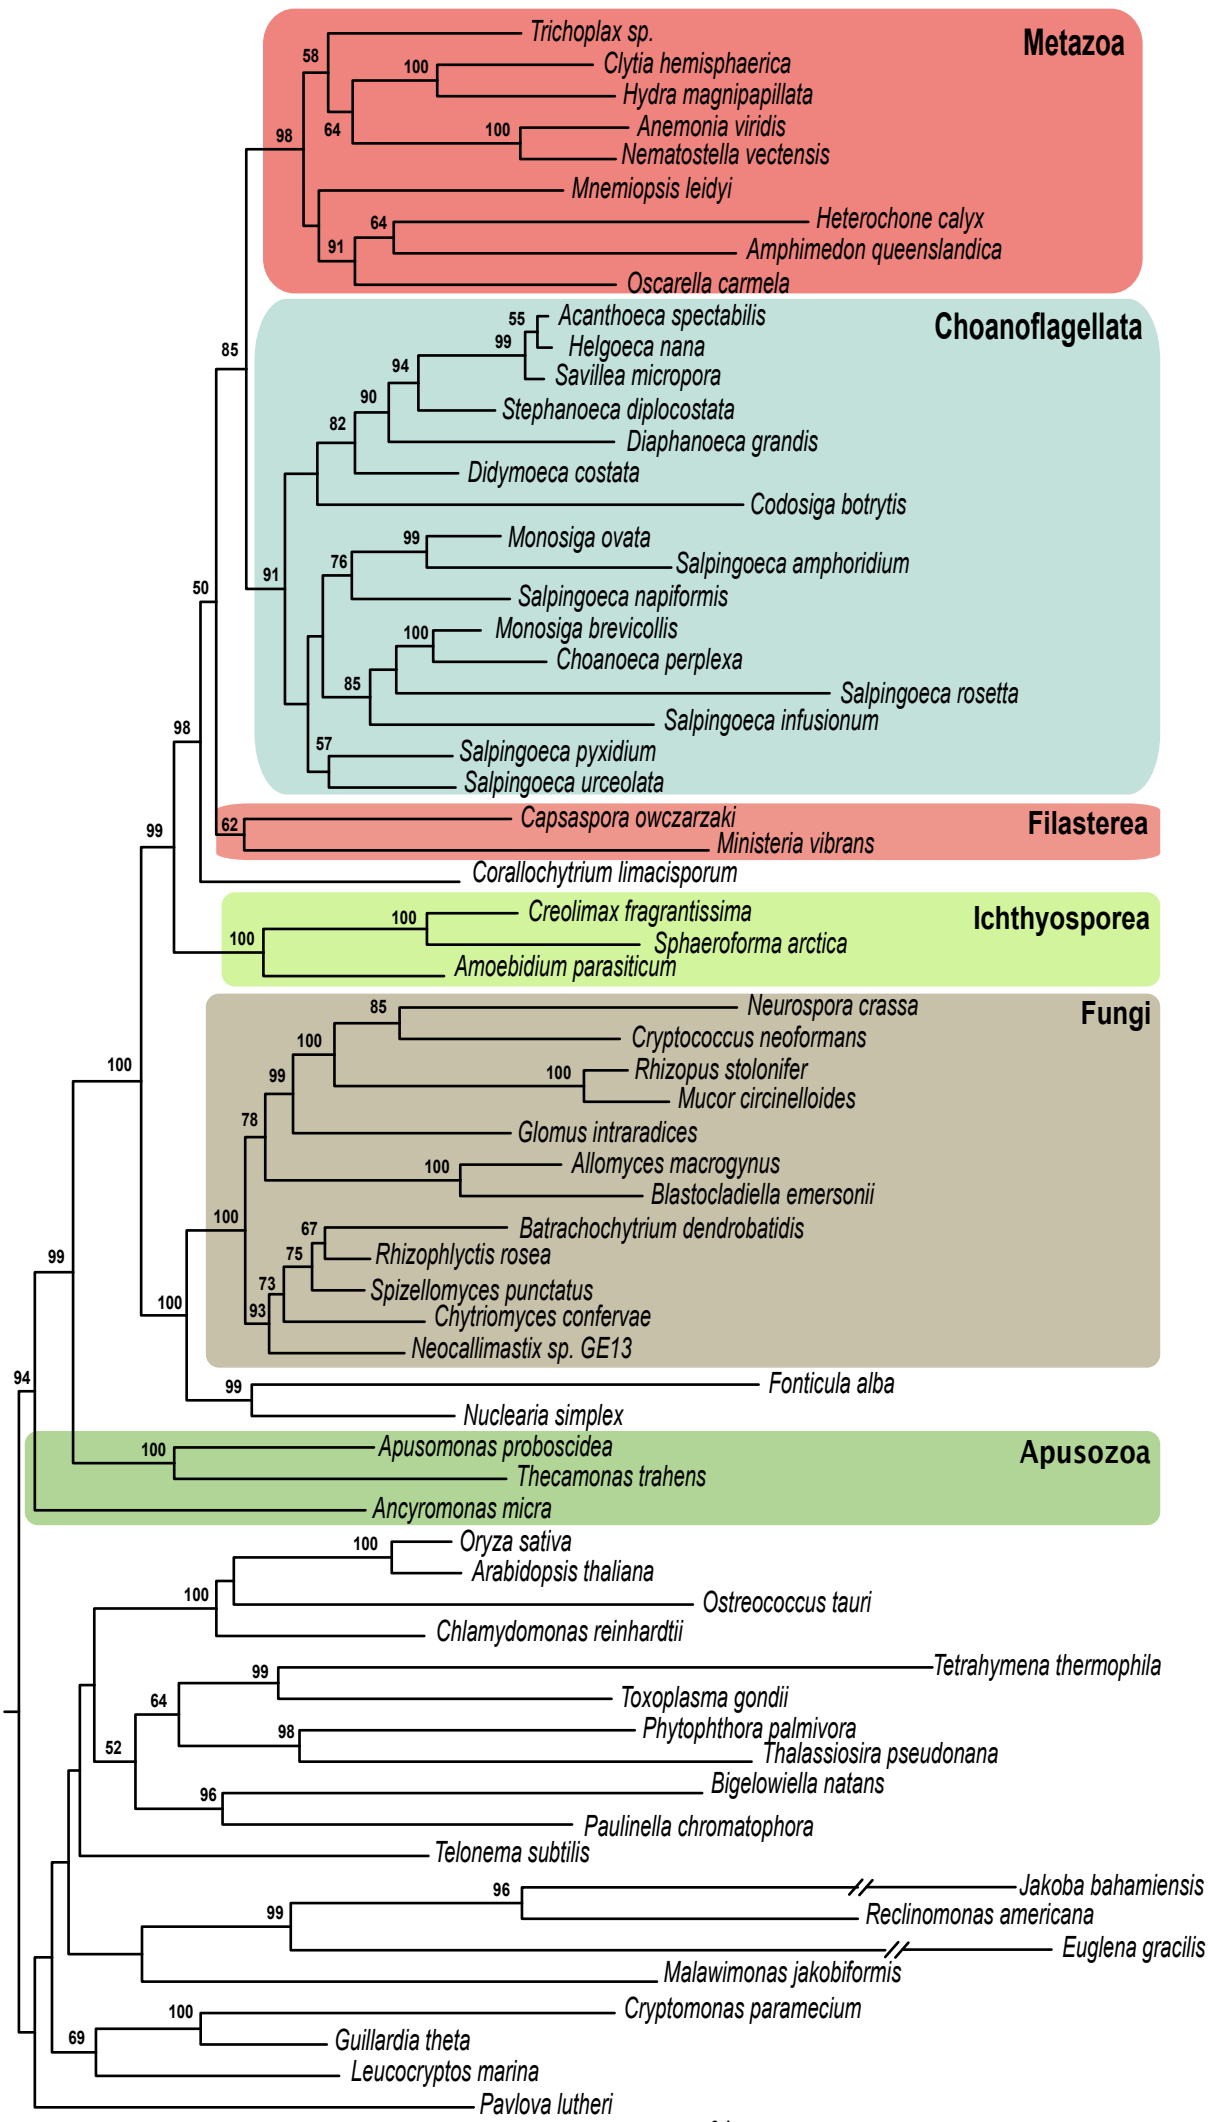

0.1

Supplement: NIHMS62057-supplement-supplementary_material_1.pdf [file NIHMS62057-supplement-supplementary_material_1.pdf]
